# Supplementary material
Source: MDPI journal article supplement (https://www.mdpi.com/search?q=molbank-2021-M1275)
Supplement: s002 [file molbank-2021-M1275-s002-mod.mol]

(S)-Apremilast.mol
  corina  09072104553D 1   1.00000     0.00000 
CORINA 4.3.0 0026  30.10.2019
 32 34  0  0  0  0  0  0  0  0999 V2000
    4.2071    1.8571   -0.0390 C   0  0  0  0  0  0  0  0  0  0  0  0
    3.4121    2.9832   -0.0344 C   0  0  0  0  0  0  0  0  0  0  0  0
    2.0214    2.8654   -0.0503 C   0  0  0  0  0  0  0  0  0  0  0  0
    1.4400    1.6000   -0.0713 C   0  0  0  0  0  0  0  0  0  0  0  0
    2.2614    0.4526   -0.0763 C   0  0  0  0  0  0  0  0  0  0  0  0
    3.6385    0.5906   -0.0614 C   0  0  0  0  0  0  0  0  0  0  0  0
    1.2216    4.0041   -0.0456 N   0  0  0  0  0  0  0  0  0  0  0  0
    1.6269    5.1150   -0.6922 C   0  0  0  0  0  0  0  0  0  0  0  0
    0.7183    6.3146   -0.7713 C   0  0  0  0  0  0  0  0  0  0  0  0
    2.7229    5.1492   -1.2103 O   0  0  0  0  0  0  0  0  0  0  0  0
    0.0524    1.1042   -0.0911 C   0  0  0  0  0  0  0  0  0  0  0  0
    0.0762   -0.2407   -0.1065 N   0  0  0  0  0  0  0  0  0  0  0  0
    1.3398   -0.7025   -0.0991 C   0  0  0  0  0  0  0  0  0  0  0  0
    1.6679   -1.8719   -0.1093 O   0  0  0  0  0  0  0  0  0  0  0  0
   -0.9469    1.7952   -0.0977 O   0  0  0  0  0  0  0  0  0  0  0  0
   -1.1168   -1.0906   -0.1289 C   0  0  0  0  0  0  0  0  0  0  0  0
   -1.0679   -2.0694    1.0460 C   0  0  0  0  0  0  0  0  0  0  0  0
   -1.1604   -1.8613   -1.4232 C   0  0  0  0  0  0  0  0  0  0  0  0
   -1.1646   -1.1476    2.6054 S   0  0  0  0  0  0  0  0  0  0  0  0
   -1.7475   -3.1122   -1.4616 C   0  0  0  0  0  0  0  0  0  0  0  0
   -1.7933   -3.8197   -2.6522 C   0  0  0  0  0  0  0  0  0  0  0  0
   -1.2374   -3.2730   -3.8047 C   0  0  0  0  0  0  0  0  0  0  0  0
   -0.6454   -2.0210   -3.7580 C   0  0  0  0  0  0  0  0  0  0  0  0
   -0.6080   -1.3181   -2.5683 C   0  0  0  0  0  0  0  0  0  0  0  0
   -1.0908   -2.4804    3.8337 C   0  0  0  0  0  0  0  0  0  0  0  0
    0.0042   -0.3494    2.7327 O   0  0  0  0  0  0  0  0  0  0  0  0
   -2.4405   -0.5274    2.6863 O   0  0  0  0  0  0  0  0  0  0  0  0
   -1.2754   -3.9656   -4.9744 O   0  0  0  0  0  0  0  0  0  0  0  0
   -0.6855   -3.3422   -6.1170 C   0  0  0  0  0  0  0  0  0  0  0  0
   -2.3759   -5.0479   -2.6931 O   0  0  0  0  0  0  0  0  0  0  0  0
   -2.9258   -5.5460   -1.4718 C   0  0  0  0  0  0  0  0  0  0  0  0
   -3.5328   -6.9297   -1.7127 C   0  0  0  0  0  0  0  0  0  0  0  0
  1  2  2  0      
  2  3  1  0      
  3  4  2  0      
  4  5  1  0      
  5  6  2  0      
  6  1  1  0      
  3  7  1  0      
  7  8  1  0      
  8  9  1  0      
  8 10  2  0      
  4 11  1  0      
 11 12  1  0      
 12 13  1  0      
 13  5  1  0      
 13 14  2  0      
 11 15  2  0      
 12 16  1  0      
 16 17  1  0      
 16 18  1  0      
 17 19  1  0      
 18 20  2  0      
 20 21  1  0      
 21 22  2  0      
 22 23  1  0      
 23 24  2  0      
 24 18  1  0      
 19 25  1  0      
 19 26  2  0      
 19 27  2  0      
 28 29  1  0      
 22 28  1  0      
 31 32  1  0      
 30 31  1  0      
 21 30  1  0      
M  STY  1   1 SUP
M  SLB  1   1   1
M  SAL   1  2  28  29
M  SBL   1  1  31
M  SMT   1 OCH3
M  SBV   1 31  -10.4985   14.5339
M  STY  1   2 SUP
M  SLB  1   2   2
M  SAL   2  3  30  31  32
M  SBL   2  1  34
M  SMT   2 OCH2CH3
M  SBV   2 34  -10.4953   15.3560
M  END
$$$$
